# Supplementary material for: Preparation, Characterization and Multiple Biological Properties of Peptide-Modified Cerium Oxide Nanoparticles
Source: MDPI journal article supplement (doi:10.3390/biom12091277), 2022-09-10
Supplement: s1 [file s1]

## Supplementary Material

# Preparation, Characterization and Multiple Biological Properties of Peptide-Modified Cerium Oxide Nanoparticles

Mengjun Wang <sup>†</sup>, Hongliang He <sup>†</sup>, Di Liu, Ming Ma <sup>\*</sup> and Yu Zhang <sup>\*</sup>

State Key Laboratory of Bioelectronics, Jiangsu Key Laboratory for Biomaterials and Devices, School of Biological Sciences and Medical Engineering, Southeast University, Nanjing 210096, China

<sup>\*</sup> Correspondence: zhangyu@seu.edu.cn (Y.Z.); maming@seu.edu.cn (M.M.)

<sup>†</sup> These authors contributed equally to this work.

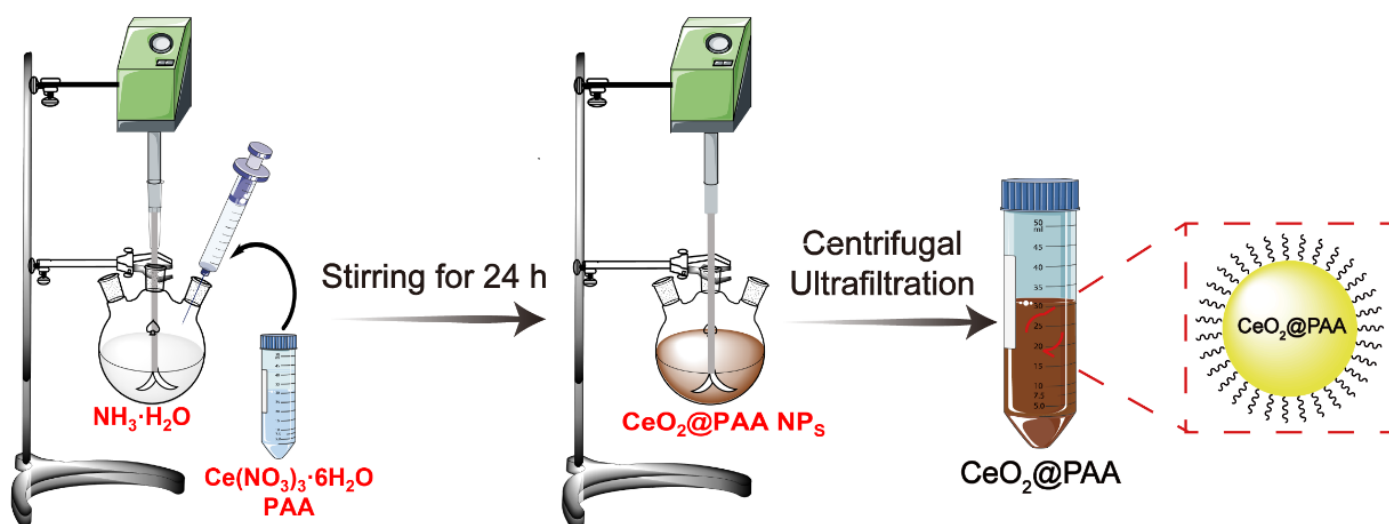

Figure S1. Schematic illustration of the preparation of CeO<sub>2</sub>@PAA NPs.

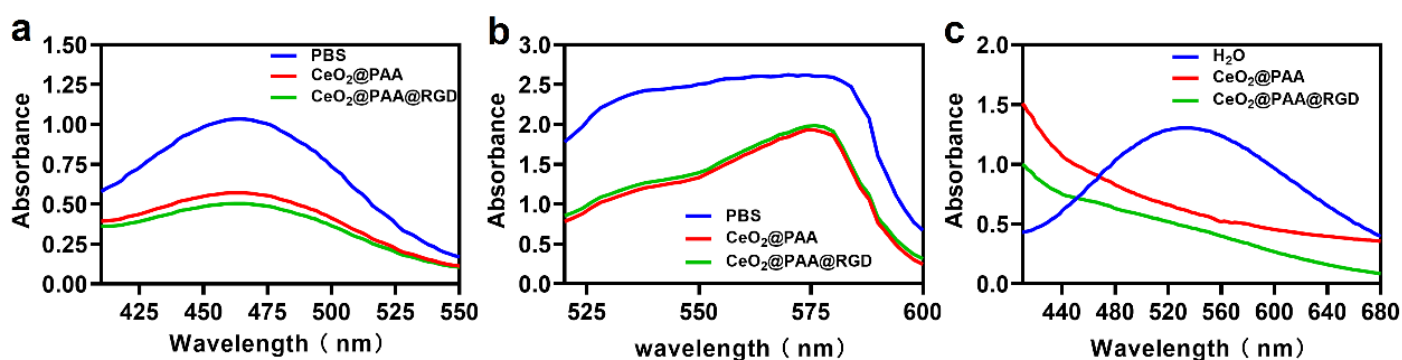

Figure S2. UV-vis absorption spectra of CeO<sub>2</sub>@PAA and CeO<sub>2</sub>@PAA@RGD towards (a)  $\text{O}_2^{\cdot -}$  and (b) H<sub>2</sub>O<sub>2</sub> and (c)  $\cdot\text{OH}$ .

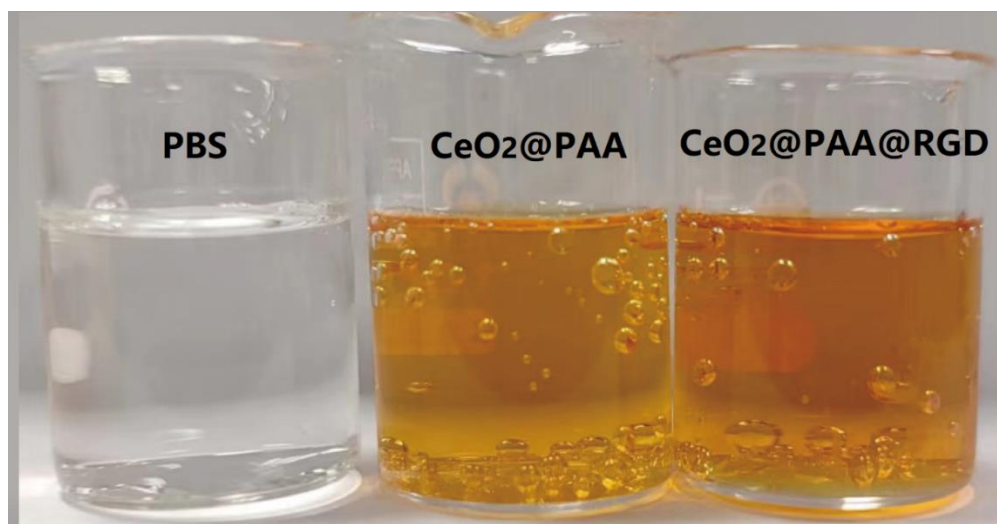

**Figure S3.** *In vitro* oxygen bubbles production with a significant yellow colour in nanoparticles to assess CAT-like activity.

**Table S1.** Reaction system for the detection of SOD-like enzyme activity

| Reagents                                        | Sample | Blank control 1 | Blank control 2 | Blank control 3 |
|-------------------------------------------------|--------|-----------------|-----------------|-----------------|
| Sample ( $\mu\text{L}$ )                        | 2      | -               | -               | 2               |
| SOD assay buffer ( $\mu\text{L}$ )              | -      | 2               | 22              | 20              |
| WST-8/enzyme working solution ( $\mu\text{L}$ ) | 160    | 160             | 160             | 160             |
| Reaction start working fluid ( $\mu\text{L}$ )  | 20     | 20              | -               | -               |

**Table S2.** Reaction systems for the detection of  $\cdot\text{OH}$

| Reagents                     | $A_0$ ( $\mu\text{L}$ ) | $A_x$ ( $\mu\text{L}$ ) | $A_{x0}$ ( $\mu\text{L}$ ) |
|------------------------------|-------------------------|-------------------------|----------------------------|
| $\text{FeSO}_4$              | 50                      | 50                      | 50                         |
| Ethanol-salicylic acid       | 50                      | 50                      | 50                         |
| Distilled water              | 15                      | -                       | 50                         |
| Sample (10 mg/mL)            | -                       | 15                      | 15                         |
| $\text{H}_2\text{O}_2$ (30%) | 50                      | 50                      | -                          |

**Table S3.** Reaction system for the synthesis of cDNA by reverse transcription.

| Component                                | Volume       |
|------------------------------------------|--------------|
| 5 x Reaction Buffer                      | 4 µL         |
| Oligo (dT) <sub>18</sub> Primer (100 µM) | 0.5 µL       |
| And Random Hexamer primer (100 µM)       | 0.5 µL       |
| Servicebio®RT Enzyme Mix                 | 1 µL         |
| Total RNA *                              | 10 µL        |
| RNase free water                         | Add to 20 µL |

**Table S4.** Primers used to detect mRNA expression of pro-inflammatory and anti-inflammatory related genes.

| Gene          | Forward Primers          | Revers Primers           |
|---------------|--------------------------|--------------------------|
| CD86          | CTGGACTCTACGACTTCACAATG  | AGTTGGCGATCACTGAGAGTT    |
| TNF- $\alpha$ | CCTGTAGCCACGTCGTAGC      | AGCAATGACTCCAAAGTAGACC   |
| IL-6          | ATCCAGTTGCCTTCTTGGGACTGA | TTGGATGGTCTTGGTCCTTAGCCA |
| CD206         | CTGCAGATGGGTGGGTATT      | GGCATTGATGCTGCTGTTATG    |
| VEGF          | AGGAGAACTGCTGTGTACGC     | CCGTGCTATGGGTATGTCT      |
| IL-10         | ACTGGCATGAGGATCAGCAG     | CTCCTTGATTCTGGGCCAT      |
